# Estimates of outbreak-specific SARS-CoV-2 epidemiological parameters from genomic data

Timothy G. Vaughan<sup>a,b,1</sup>, Jérémie Sciré<sup>a,b</sup>, Sarah A. Nadeau<sup>a,b</sup>, and Tanja Stadler<sup>a,b,1</sup>

<sup>a</sup>Department of Biosystems Science and Engineering, ETH Zurich, Mattenstrasse 26, 4058 Basel, Switzerland; <sup>b</sup>Swiss Institute of Bioinformatics

This manuscript was compiled on September 12, 2020

**We estimate the basic reproductive number and case counts for 15 distinct SARS-CoV-2 outbreaks, distributed across 10 countries and one cruise ship, based solely on phylodynamic analyses of genomic data. Our results indicate that, prior to significant public health interventions, the reproductive numbers for a majority (10) of these outbreaks are similar, with median posterior estimates ranging between 1.4 and 2.8. These estimates provide a view which is complementary to that provided by those based on traditional line listing data. The genomic-based view is arguably less susceptible to biases resulting from differences in testing protocols, testing intensity, and import of cases into the community of interest. In the analyses reported here, the genomic data primarily provides information regarding which samples belong to a particular outbreak. We observe that once these outbreaks are identified, the sampling dates carry the majority of the information regarding the reproductive number. Finally, we provide genome-based estimates of the cumulative case counts for each outbreak, which allow us to speculate on the amount of unreported infections within the populations housing each outbreak. These results indicate that for the majority (7) of the populations studied, the number of recorded cases is much bigger than the estimated cumulative case counts, suggesting the presence of unsequenced pathogen diversity in these populations.**

phylodynamics | epidemiology | SARS-CoV-2

The novel coronavirus SARS-CoV-2 and the corresponding disease COVID-19 continue to spread at an alarming rate. As of the 27<sup>th</sup> of August 2020, close to 9 months after its initial identification, over 24 million confirmed cases and nearly seven hundred thousand deaths have been reported globally. (1).

In order to understand the global threat this pandemic poses, it is necessary to accurately quantify the underlying transmission dynamics of the virus and, in particular, its basic reproductive number (2). This information is used to determine the likely future trajectories of individual outbreaks, and to retrospectively assess the impact of containment measures. Inference of the transmission dynamics is traditionally achieved using line list data (3) comprised of case confirmation times, locations and patient details, and this approach is being widely applied (4–7) by various groups around the world seeking to understand the current pandemic.

In particular, the *EpiForecasts* platform (8) is reporting frequently-updated results based on these methods as new line list data becomes available. While details vary between countries, these analyses indicate that the median estimates for the basic reproductive number for the populations studied in this report lie between 1.5 and 3. Our own monitoring of the reproductive number is updated daily using the latest confirmation, hospitalization, death, and excess death data with a focus on European countries (9) leading to similar results.

Despite the wide-spread application of such methods, the estimates produced by line list data alone are inherently susceptible to several biases and limitations (10–12). Firstly, the presence of pools of undiagnosed infected individuals, together with changes in testing methods and the extent to which testing is happening at all, can lead to misleading characterizations of the epidemic. Secondly, it is often impossible to discriminate between import cases and those attributable to local transmission based on line list data. This has the potential to produce overestimates of local transmission rates. Estimating rates and directions of transmission between geographic regions is similarly impeded. Thirdly, on their own, these data do not provide information about the state of outbreaks before the first recorded case.

Characterizing transmission dynamics is critical to the successful design of public health interventions. Thus, finding ways around potential biases and limitations when quantifying transmission dynamics is crucial. Fortunately, early testing efforts have been paralleled by significant efforts to sequence SARS-CoV-2 genomes from the initial outbreak and subsequent pandemic in “real time”. Many of the groups responsible for sequencing SARS-CoV-2 genomes have generously chosen to make them available immediately to the public research community via the GISAID platform (13). These data have been successfully used for the development of testing assays (14) and for learning about the molecular structure of the virus (15, 16). Importantly, the continued and widespread sequencing efforts has also enabled — in combination with phylodynamic methods (17, 18), independent, and potentially

## Significance Statement

Since the beginning of the COVID-19 outbreak in late 2019, researchers around the globe have sought to estimate the rate at which the disease spread through populations prior to public health intervention, as quantified by the parameter  $R_0$ . This is often estimated based on case count data and may be biased due to the presence of import cases. To overcome this, we estimate  $R_0$  by applying Bayesian phylodynamic methods to SARS-CoV-2 genomes which have been made available by laboratories worldwide. We provide  $R_0$  and absolute infection count estimates for 15 distinct outbreaks. These estimates contribute to our understanding of the baseline transmission dynamics of the disease, which will be critical in guiding future public health responses to the pandemic.

TGV, JS, SAN and TS designed research; SAN assembled and curated sequence data; TGV and JS performed analyses; TGV, JS, SAN and TS wrote the paper.

The authors declare no competing interests.

<sup>1</sup>To whom correspondence should be addressed. E-mail: [timothy.vaughan@bsse.ethz.ch](mailto:timothy.vaughan@bsse.ethz.ch) or [tanja.stadler@bsse.ethz.ch](mailto:tanja.stadler@bsse.ethz.ch).

56 more robust, estimates of very early transmission dynamics.

57 Phylodynamic methods couple epidemiological models with  
58 models of sequence evolution, allowing us to estimate trans-  
59 mission dynamics based on the relationships between SARS-  
60 CoV-2 genome sequences. Several studies have already made  
61 use of SARS-CoV-2 sequence data in a phylodynamic context.  
62 For example, Lai et al. (19) inferred early dynamics of the  
63 global effective reproductive number, using all available se-  
64 quences at the date of publishing, obtaining an  $R_0$  estimate  
65 of 2.6, with a 95% credible interval [2.1, 5.1]. In contrast, Volz  
66 et al. (20) focused on a specific Wuhan-associated outbreak  
67 cluster and used a compartment model to also infer a basic  
68 reproductive number of 2.6, but with a 95% credible inter-  
69 val [1.5, 5]. Genomes have also been coupled with extremely  
70 detailed agent-based models to infer the probable sources of  
71 infection for specific COVID-19 cases within the Australian  
72 population (21).

73 In this paper we go further and infer the basic reproductive  
74 number ( $R_0$ ) for each of 15 distinct outbreaks distributed  
75 among 10 countries and the Diamond Princess cruise ship using  
76 phylodynamic methods. We use Bayesian model averaging  
77 to quantify the evidence for distinct  $R_0$  values as opposed to  
78 groups of outbreaks sharing  $R_0$  values. Finally, we provide  
79 Bayesian estimates of cumulative case counts over time for  
80 each of the outbreaks as ensembles of possible trajectories.

## 81 Results

82 We used the *NextStrain* (22) platform to identify outbreak  
83 clusters for which sequence data exist, and selected only those  
84 sequences sampled prior to or just after the introduction of  
85 strong public health interventions in the associated locations  
86 (see Methods). (The Diamond Princess outbreak is an excep-  
87 tion to this protocol, as the interventions were put in place  
88 immediately on the date corresponding to the first sequenced  
89 sample.)

90 We then applied a Bayesian phylodynamic framework (17),  
91 to co-infer  $R_0$  along with the probability of a infected person  
92 being included in our dataset, and the underlying phylogenetic  
93 trees for these clusters. This inference was done under the  
94 assumption of constant transmission rates (i.e. a constant rate  
95 birth-death process) for each cluster, with the sole exception of  
96 the Diamond Princess, where we allowed for the transmission  
97 rate to shift at the time of the onboard quarantine.

98 Figure 1 illustrates the posterior distributions for  $R_0$  as-  
99 sociated with each of the outbreaks, together with the prior  
100 distribution for comparison. Interestingly, rather than a con-  
101 tinuum of values, our analysis seems to isolate several distinct  
102 modes. The median posteriors for the majority of outbreaks lie  
103 between 1.4 and 2.9. However, the  $R_0$  values inferred for the  
104 two outbreaks associated with Iceland, the Welsh outbreak, a  
105 Washington State (USA) outbreak and the Diamond Princess  
106 outbreak have posterior median values ranging between 4 and  
107 7. We used a Bayesian model averaging scheme to quantify  
108 the number of significantly distinct  $R_0$  values among all out-  
109 breaks, and found support for four distinct values (see figure  
110 S1 for the posterior distribution). The corresponding posterior  
111 distributions for the outbreak-specific  $R_0$  values generated by  
112 this model are shown in figure S2. A comparison of the pre-  
113 and post-quarantine effective reproductive number estimates  
114 for the Diamond Princess outbreak is shown in figure S3, and  
115 shows a significant drop in transmission rate following the im-

plementation of isolation measures. The proportion of infected  
individuals sampled for sequencing in each outbreak was also  
inferred as part of this analysis and these results are shown in  
figure S4.

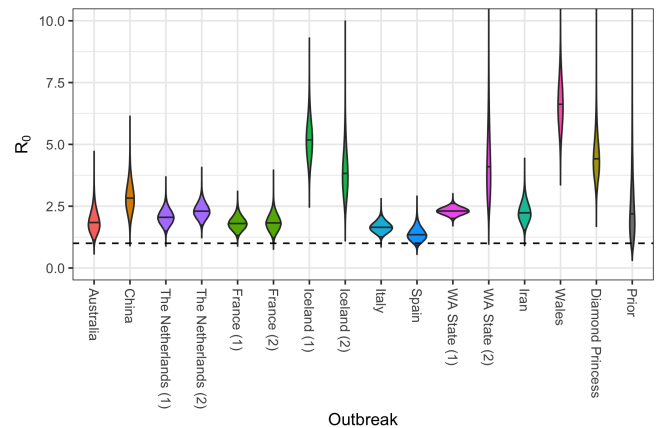

Fig. 1. Posterior distributions for reproductive numbers for outbreaks considered in this study. Solid horizontal lines represent median values; the dashed horizontal line represents the threshold between exponential growth and decline of outbreak.

120 Birth-death phylodynamic results are dependent not only  
121 on the genomic data, but also on the distribution of sample  
122 collection dates. In fact, we find that in this instance, the  
123 sample collection dates carry *most* of the information regarding  
124  $R_0$ . We demonstrated this by running an additional set of  
125 phylodynamic analyses in which the genomic sequences were  
126 treated as unknown. Additionally, we applied both a simplistic  
127 linear regression approach (see Methods) and an established  
128 traditional approach (12) to the cumulative sequence counts.  
129 The results of these alternative analyses are summarized in  
130 figure S5 and—in many cases—show relatively close agreement,  
131 albeit with slightly less certainty in the estimates than those  
132 shown in figure 1.

133 Given this dominating effect of the sampling times, it is  
134 natural to consider how sensitive our results are to the as-  
135 sumption that the sampling rate and reproductive number  
136 are fixed over the time period of each outbreak. We thus  
137 performed a separate set of analyses in which these quantities  
138 were allowed to change at a point at the center of the sampling  
139 window of each outbreak (excluding the Diamond Princess  
140 outbreak). The resulting  $R_0$  estimates, presented in figure S8,  
141 show no major change in the results compared with those in  
142 figure 1, with the exception of the Netherland (1) and WA  
143 States (1) outbreaks which suggest higher  $R_0$  values. In order  
144 to investigate how much our results are impacted by the prior,  
145 we repeated the fixed-rate analyses with a broader prior on  
146  $R_0$ . This broad prior did not qualitatively change the results  
147 compared to our main analysis (figure S9).

148 Inferred cumulative case count trajectories for the Wash-  
149 ington State and Diamond Princess outbreaks are shown in  
150 figure 2 alongside the daily number of confirmed cases as re-  
151 ported by the Center for Systems Science and Engineering at  
152 Johns Hopkins University (23), to which we have applied a 10  
153 day offset in order to account for the estimated delay between  
154 infection and case confirmation (9). In the cases where two  
155 outbreaks are associated with the same location, the inferred  
156 case counts are combined. Similar case count trajectories for

157 the remaining populations are provided in figure S6. The  
158 posterior distributions for case counts at the time of the most  
159 recent genome sample are shown for all populations in figure 3.

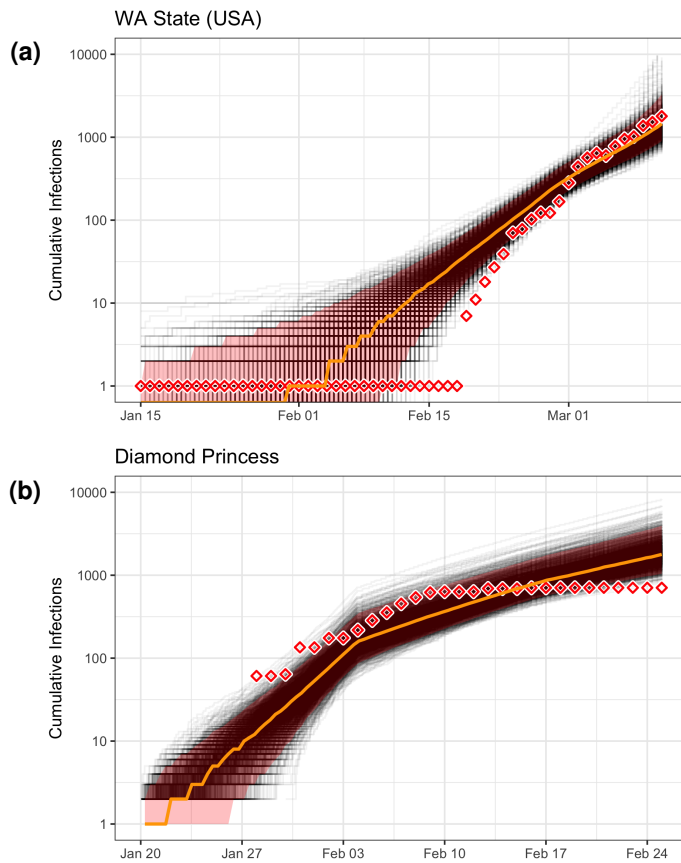

**Fig. 2.** Inferred cumulative case count trajectories for (a) Washington State, USA, and (b) the Diamond Princess cruise ship. They are shown together with the corresponding recorded case counts (diamonds) in each population as recorded by Dong, Du and Gardner (23), which are offset by 10 days to account for the delay between infection and case confirmation (9). Note that these inferences concern only those cases associated with the specific outbreak from which the sequence data are drawn, as detailed in the discussion section. The true cumulative case counts may have been much higher. (Inference for remaining outbreaks are shown in figure S6.)

160 **Discussion.** Our central result is that prior to strong public  
161 health interventions, the majority (10) of the outbreaks studied  
162 seem to have grown at rates with median  $R_0$  values ranging  
163 between 1.4 (Spain) and 2.8 (China).

164 The specific case of the Diamond Princess is interesting, as  
165 the details of this outbreak are well known and, at least for  
166 the time period affecting our analysis, the population involved  
167 was strictly isolated (i.e. we can say with a high degree of  
168 certainty that no immigration or emigration occurred). In this  
169 case, we believe the high pre-intervention  $R_0$  estimate reflects  
170 a real elevated infection rate caused by unchecked transmission  
171 within the relatively confined on-board environment.

172 The remaining outbreaks to which higher  $R_0$  values are  
173 attributed are limited to those with the shortest sampling  
174 windows (see figure S7). Given the strong role played by  
175 sample times in these inferences, it is therefore possible that  
176 these values are the result of bias due to sampling model  
177 misspecification, and that this problem is exacerbated by the

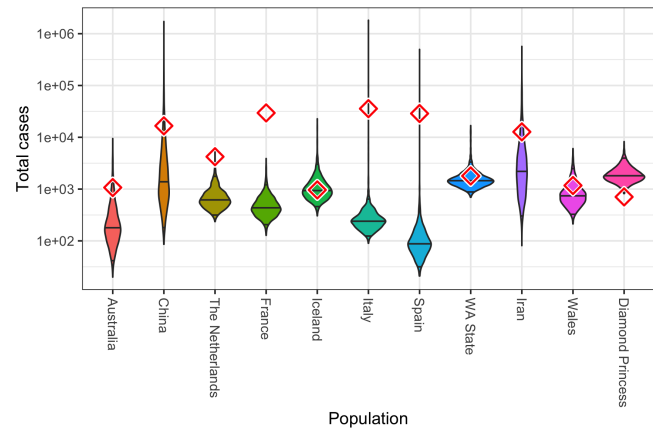

**Fig. 3.** Estimates of cumulative case counts obtained from phylodynamic analyses, with diamonds indicating recorded counts obtained from Dong, Du and Gardner (23), offset by 10 days to account for the delay between infection and case confirmation (9). The counts are for the date of the final genome sample considered in each population. We note that we have likely analyzed only a subset of the total number of outbreaks which were circulating in each country.

short sampling windows involved. The sampling model used  
for these outbreaks assumes that samples accumulate at a rate  
proportional to the number of infectious cases for the duration  
over which samples are available. We showed that allowing  
for a single shift in sampling rate and  $R_0$  during the outbreak  
did not result in much lower  $R_0$  values for these remaining  
outbreaks.

Another potential source of upward bias on  $R_0$  is the process  
of outbreak selection. We necessarily restrict our attention to  
outbreaks for which sufficient data exist to provide statistical  
signal. This restriction may have the effect of selecting for  
steeper outbreak trajectories. Since the birth-death models  
under which we perform the inference do not account for this  
conditioning, these steeper trajectories will be interpreted as  
evidence for larger  $R_0$ , even when the increased gradient is  
simply the result of demographic noise in the growth of the  
epidemic. Including appropriate conditioning in phylodynamic  
inference to guard against this kind of bias will be the focus  
of future research.

Given that most of information content in the genome  
sequence data analyzed seems to come from sampling times, it  
is natural to wonder whether the phylodynamic approach offers  
additional insights on these outbreaks. The obvious answer  
to this challenge is that, genomic data allowed us to identify  
outbreaks in the absence of contact tracing data, which is  
often not available for study. Furthermore, even though the  
impact of the phylogeny *within* each identified outbreak on the  
inferred epidemic parameters was negligible, the application  
of phylodynamic methods yield information about the total  
number of cases through time, including those which have  
gone undetected.

We emphasize, however, that extreme care must be taken  
when interpreting both these inferred and clinically confirmed  
case counts as representative of the true underlying case load.  
Firstly, our inferences correspond to the number of cases  
associated only with the specific outbreaks from which the  
genomic data originate. It is entirely possible that additional  
outbreaks, from which we do not have genetic data, occurred  
within a given population during the time periods considered.



217 These cryptic outbreaks could contribute to the confirmed  
218 case counts but would be absent from our phylodynamic infer-  
219 ence. Secondly, the confirmed case numbers themselves can  
220 only provide a lower bound on the true number of cases in  
221 a population. Taken together, these points imply that the  
222 larger of the phylodynamically-inferred case counts and the  
223 corresponding confirmed case counts provide a lower bound  
224 on the true number of cases within each population.

225 We highlight in this paper the importance of SARS-CoV-2  
226 genomes for quantifying transmission dynamics. In particular,  
227 we provide estimates for the basic reproductive number which  
228 are complementary to classic epidemiological studies. Our  
229 phylodynamic analyses of SARS-CoV-2 genomes confirm the  
230  $R_0$  estimates for Wuhan (5) and provide estimates for 15  
231 outbreaks around the world for which classic epidemiological  
232 methods are problematic due to the difficulty of disentangling  
233 introductions from local transmissions. Going forward, we  
234 are convinced that SARS-CoV-2 genomes will become useful  
235 for quantifying changes in transmission rates (for instance,  
236 using the BDSKY model of Stadler et al. (17)) and become  
237 essential for evaluating the importance of local transmission  
238 versus imports (for instance, using the multi-type birth-death  
239 model of Kühnert et al. (24)). The latter is in particular  
240 important after the end of lock-down measures which we  
241 currently experience in many European countries. Indeed, for  
242 patients whose infection is not traceable, it is the genomes  
243 which contain valuable information for linking them into the  
244 transmission chain and thus quantify transmission dynamics.

## 245 Materials and Methods

246 **Outbreak identification and sample selection.** The birth-death mod-  
247 els we employ assume that genome samples are taken uniformly at  
248 random from the infectious population during the early, exponential  
249 growth phase of each outbreak. Since our analysis is necessarily  
250 retrospective rather than prospective, we devised two strategies  
251 to approximate such a sampling scheme using publicly-available  
252 samples from GISAID (13). For sparsely-sampled, un-sampled, or  
253 clearly non-uniformly sampled outbreaks (Italy, Iran, and China be-  
254 fore the quarantine of Wuhan, respectively), we included sequences  
255 from cases that were exposed in the region of interest and sub-  
256 sequently traveled abroad, where they were then diagnosed and  
257 sampled. (The sequences attributed to the Iranian outbreak, for  
258 example, are all travel cases isolated and sequenced in Australia  
259 (25).) For more densely-sampled outbreaks (France, Iceland, the  
260 Netherlands, Spain, Wales, and Washington State, USA), we an-  
261 alyzed samples that were exposed and sampled within the region  
262 of interest. For these outbreaks, we considered only samples that  
263 clustered together with other samples from the same region in a  
264 phylogenetic tree of the global pandemic (22). This was done in  
265 order to sample primarily within-region transmission events.

266 **Sample acquisition and curation.** We downloaded all sequences avail-  
267 able on GISAID (13) on April 1<sup>st</sup>, 2020. After quality-filtering this  
268 sequence set, we aligned the sequences, built a phylogenetic tree,  
269 and identified regional outbreak clusters within the tree. Sequence  
270 quality-control, alignment, and tree building were all performed  
271 using the Nextstrain pipeline adapted to SARS-CoV-2 (26).

272 We first filtered the available sequences to exclude sequences  
273 shorter than 25,000 base pairs, sequences with imprecise sampling  
274 dates, known re-samples of the same case, low-quality sequences (as  
275 determined by Nextstrain), and all but one sequence from known  
276 epidemiologically-linked cases. We note that our knowledge of which  
277 samples come from epidemiologically-linked cases (as identified by  
278 Nextstrain and gleaned from media reports) is far from exhaust-  
279 ively. Whenever we were able to access this information we used  
280 it to exclude non-randomly sampled sequences, but in many cases

the relevant information was either not collected or not readily  
accessible.

283 **Alignment and outbreak detection.** After these filtering steps, we  
284 aligned the remaining sequences to a reference genome generated  
285 from an early COVID-19 patient in Wuhan (GenBank accession  
286 number MN908947) (27). SNPs in the first 130 sites, last 50 sites,  
287 and at sites 18529, 29849, 29851, and 29853 were masked from the  
288 alignment because they are likely sequencing artifacts (26).

289 We built a maximum-likelihood phylogenetic tree using this  
290 alignment. We then picked clades from this tree where sufficient  
291 ( $\geq 9$ ) samples from the same region clustered together. We assume  
292 that these clusters represent primarily within-country transmission  
293 events rather than introductions from abroad.

294 Exceptionally for the Italy, Iran, and China outbreaks we addi-  
295 tionally identified samples from cases that were presumably exposed  
296 to the virus in these regions but were sampled abroad (travel cases).  
297 The data set for Italy included sequences from both non-travel and  
298 travel cases, while those for China and Iran were composed exclu-  
299 sively of sequences from travel cases. This exposure information  
300 comes from metadata available on GISAID and Nextstrain, as well as  
301 information provided by sequencing centers and in media accounts.

302 **Sample set truncation.** To limit sampling to the early, exponential  
303 growth phase of each regional outbreak, we truncated sampling  
304 based on the dates of major public health interventions (Table S1).  
305 We retained only samples collected before or on the date of these  
306 public health interventions, with the exception of the Iran, Iceland,  
307 and Spain outbreaks. For these outbreaks, we extended the time  
308 cutoff so that the sample size was not prohibitively small. (The  
309 extension for Iran was 11 days, for Iceland it was 2 days, and the  
310 cutoff for Spain was extended by 1 day, as shown in Table S1.) Since  
311 the transmission events leading to sampled cases likely happened at  
312 least a few days before sampling, these cutoffs should, for the most  
313 part, be conservative.

## 314 Phylodynamic analyses.

315 **Main analyses.** Sequence alignments were analyzed jointly as part of  
316 a single Bayesian phylodynamic analysis using the BDSKY package  
317 (17) of BEAST 2 (28), using a single HKY+ $\Gamma$  substitution model  
318 with a strict clock rate fixed to  $8 \times 10^{-4}$  substitutions/site/year  
319 (following Nextstrain (22)). The tree  $\mathcal{T}^{(c)}$  corresponding to each  
320 outbreak cluster  $c$  was assumed to be produced by a birth-death pro-  
321 cess with reproductive number  $R_0^{(c)}$ , sampling proportion  $s^{(c)}$  and  
322 become uninfected rate  $\delta$ . In each case, the sampling proportion  
323 for the outbreak was assumed to be zero before the first included  
324 sample for that outbreak. In the special case of the Diamond  
325 Princess outbreak, a second (effective)  $R_0$  value was associated with  
326 the days following the on-board intervention. All  $R_0$  values were  
327 assumed to be independent and given a LogNormal(0.8, 0.5) prior.  
328 The time between the start of the birth-death process associated  
329 with each outbreak and the time of the most recent sample for the  
330 same outbreak was given a LogNormal(-2, 0.8) prior. The value of  
331 the become uninfected rate  $\delta$  was fixed to 36.5, equivalent to an  
332 expected time until becoming uninfected for each individual of 10  
333 days. (This is in line with the estimates of the latent and infectious  
334 periods provided by Li et al. (4), and follows the assumptions used  
335 by Sciré et al. (9).)

336 A second analysis was run with an identical model configuration  
337 to the first analysis, aside from its use of Bayesian model averaging  
338 to quantify the number of distinct  $R_0^{(c)}$  values needed to describe  
339 the outbreaks. This was done by applying a Dirichlet process prior  
340 (DPP) to the vector  $\vec{R}_0 = [R_0^{(c_1)}, R_0^{(c_2)}, \dots, R_0^{(c_{15})}]$ . Following the  
341 prescription of Dorazio (29), a Gamma hyperprior was applied to  
342 the intensity parameter of the DPP such that the implied prior  
343 distribution for the number of unique elements of  $\vec{R}_0$  was as close to  
344 uniform as possible. The base distribution of the DPP was chosen  
345 to be LogNormal(0.8, 0.5). The prior for each the sampling propor-  
346 tion was chosen to be Beta(1, 4), which prioritizes low sampling  
347 probabilities without completely excluding higher probabilities.

348 **Sensitivity analyses.** We ran two additional analyses to determine  
349 the sensitivity of our conclusions to the model assumptions. Firstly,  
350 to test the robustness with respect to changes in the  $R_0$  priors,

351 we ran a separate analysis using a  $\text{Unif}(0,10)$  prior for each  $R_0^{(c)}$   
352 parameter. Secondly, we ran an analysis in which both  $R_0^{(c)}$  and  
353  $s^{(c)}$  were allowed to change once during each outbreak, at a time  
354 midway between the first and last sample assigned to that outbreak.

355 **Sample-date only analyses.** In order to assess the relative impact of  
356 the sequence data on these  $R_0^{(c)}$  estimates, another joint phylody-  
357 namic analysis was performed using the same setup as the first, but  
358 without any sequence data.

359 Additionally, a simple regression inference of the  $R_0^{(c)}$  was con-  
360 ducted by assuming that the number of active infections associated  
361 with each outbreak grew according to the deterministic function  
362  $N^{(c)}(t) = \exp[\delta(R_0^{(c)} - 1)t]$ . This implies that the logarithm of the  
363 cumulative number of samples grows linearly at the rate  $\delta(R_0^{(c)} - 1)$ ,  
364 which we then fit to the empirical cumulative sample numbers from  
365 each outbreak.

366 In order to test the robustness of the phylodynamic estimates  
367 of the outbreak-specific  $R_0^{(c)}$  values, we applied EpiEstim (12)  
368 to the same sample time distributions used for the regression analysis.  
369 In these analyses,  $R_0^{(c)}$  was assumed to be constant through time  
370 in each outbreak. A serial interval of mean 4.8 days and standard  
371 deviation 2.3 days was used (30).

372 **Case count trajectory inference.** Inference of cumulative case count  
373 trajectories was achieved by applying the particle filter algorithm im-  
374 plemented in EpiInf (31) to the outbreak-specific tree and parameter  
375 posteriors produced by the corresponding BDSKY analyses.

376 **Data availability.** The sequences used in this study are distributed  
377 via GISAID (<https://gisaid.org>). The acknowledgements table  
378 available at [https://github.com/tgvaughan/R0-manuscript-materials/blob/](https://github.com/tgvaughan/R0-manuscript-materials/blob/master/sequences/GISAID_Acknowledgement_Table.csv)  
379 [master/sequences/GISAID\\_Acknowledgement\\_Table.csv](https://github.com/tgvaughan/R0-manuscript-materials/blob/master/sequences/GISAID_Acknowledgement_Table.csv) lists the acces-  
380 sion numbers for the sequences associated with each cluster, together  
381 with the names of the institutions and authors who generously con-  
382 tributed the sequences.

383 The BEAST 2 XML files used to perform the phylodynamic  
384 analyses, together with the R scripts used for post-processing, are  
385 available from <https://github.com/tgvaughan/R0-manuscript-materials/>.

386 **ACKNOWLEDGMENTS.** We thank the numerous institutions  
387 and authors who generously made SARS-CoV-2 genomes available  
388 for public research via the GISAID platform. TGV, JS, SAN and  
389 TS thank ETH Zürich for funding.

- 390 1. World Health Organization, Coronavirus disease 2019 (covid-19) situation report (2020).
- 391 2. B Ridenhour, JM Kowalik, DK Shay, Unraveling r0: Considerations for public health applica-  
392 tions. *Am. J. Public Heal.* **108**, S445–S454 (2018).
- 393 3. CT Bauch, JO Lloyd-Smith, MP Coffee, AP Galvani, Dynamically modeling SARS and other  
394 newly emerging respiratory illnesses. *Epidemiology* **16**, 791–801 (2005).
- 395 4. R Li, et al., Substantial undocumented infection facilitates the rapid dissemination of novel  
396 coronavirus (SARS-CoV2). *Science*, eabb3221 (2020).
- 397 5. Y Liu, AA Gayle, A Wilder-Smith, J Rocklöv, The reproductive number of COVID-19 is higher  
398 compared to SARS coronavirus. *J. Travel. Medicine* **27** (2020).
- 399 6. H Tian, et al., An investigation of transmission control measures during the first 50 days of  
400 the COVID-19 epidemic in china. *Science* **368**, 638–642 (2020).
- 401 7. J Riou, CL Althaus, Pattern of early human-to-human transmission of wuhan 2019 novel  
402 coronavirus (2019-nCoV), december 2019 to january 2020. *Eurosurveillance* **25** (2020).
- 403 8. Temporal variation in transmission during the covid-19 outbreak (2020).
- 404 9. J Sciré, et al., Reproductive number of the covid-19 epidemic in switzerland with a focus on  
405 the cantons of basel-stadt and basel-landschaft. *Swiss Med. Wkly.* **150**, w20271 (2020).
- 406 10. YH Grad, M Lipsitch, Epidemiologic data and pathogen genome sequences: a powerful syn-  
407 ergy for public health. *Genome Biol.* **15** (2014).
- 408 11. T Britton, GS Tomba, Estimation in emerging epidemics: biases and remedies. *J. The Royal*  
409 *Soc. Interface* **16**, 20180670 (2019).
- 410 12. A Cori, NM Ferguson, C Fraser, S Cauchemez, A new framework and software to estimate  
411 time-varying reproduction numbers during epidemics. *Am. J. Epidemiol.* **178**, 1505–1512  
412 (2013).
- 413 13. GISAID Sequence Database (year?).
- 414 14. AB Keener, Four ways researchers are responding to the COVID-19 outbreak. *Nat. Medicine*  
415 (2020).
- 416 15. R Lu, et al., Genomic characterisation and epidemiology of 2019 novel coronavirus: implica-  
417 tions for virus origins and receptor binding. *The Lancet* **395**, 565–574 (2020).
- 418 16. G Tairaoa, et al., Direct RNA sequencing and early evolution of SARS-CoV-2. *bioRxiv* (2020)  
419 (preprint).
- 420 17. T Stadler, D Kühnert, S Bonhoeffer, AJ Drummond, Birth-death skyline plot reveals temporal  
421 changes of epidemic spread in hiv and hepatitis c virus (hcv). *Proc Natl Acad Sci U S A* **110**,  
422 228–233 (2013).

18. EM Volz, Complex population dynamics and the coalescent under neutrality. *Genetics* **190**,  
423 187–201 (2012).
19. A Lai, A Bergna, C Acciarri, M Galli, G Zehender, Early phylogenetic estimate of the effective  
424 reproduction number of SARS-CoV-2. *J. Med. Virol.* (2020).
20. E Volz, et al., Genomic epidemiology of a densely sampled COVID19 outbreak in china.  
425 *medRxiv* (2020) (preprint).
21. RJ Rockett, et al., Revealing COVID-19 transmission in australia by SARS-CoV-2 genome  
426 sequencing and agent-based modeling. *Nat. Medicine* (2020).
22. J Hadfield, et al., Nextstrain: real-time tracking of pathogen evolution. *Bioinformatics* **34**,  
427 4121–4123 (2018).
23. E Dong, H Du, L Gardner, An interactive web-based dashboard to track COVID-19 in real  
428 time. *The Lancet Infect. Dis.* **20**, 533–534 (2020).
24. D Kühnert, T Stadler, TG Vaughan, AJ Drummond, Phylodynamics with migration: A compu-  
429 tational framework to quantify population structure from genomic data. *Mol. biology evolution*  
430 **33**, 2102–2116 (2016).
25. JS Eden, et al., An emergent clade of SARS-CoV-2 linked to returned travellers from iran.  
431 *Virus Evol.* **6** (2020).
26. Nextstrain sars-cov-2 resources (2020).
27. F Wu, et al., A new coronavirus associated with human respiratory disease in china. *Nature*  
432 **579**, 265–269 (2020).
28. R Bouckaert, et al., BEAST 2.5: An advanced software platform for Bayesian evolutionary  
433 analysis. *PLoS Comput. Biol.* **15**, e1006650 (2019).
29. RM Dorazio, On selecting a prior for the precision parameter of dirichlet process mixture  
434 models. *J. Stat. Plan. Inference* **139**, 3384–3390 (2009).
30. H Nishiura, NM Linton, AR Akhmetzhanov, Serial interval of novel coronavirus (covid-19)  
435 infections. *Int. journal infectious diseases* (2020).
31. TG Vaughan, et al., Estimating epidemic incidence and prevalence from genomic data. *Mol.*  
436 *Biol. Evol.* **36**, 1804–1816 (2019).
